# Supplementary material
Source: PubMed Central journal article supplement (PMC2077397)
Supplement: jnnpsyc_jnnp.2006.089391_1.pdf [file jnnpsyc_jnnp.2006.089391_1.pdf]

**Web-table 1** Studies on long-term functioning and health status after stroke

| Author                     | N   | C/H | age   | Type of stroke   | F-up  | Outcome measures                                                                 |
|----------------------------|-----|-----|-------|------------------|-------|----------------------------------------------------------------------------------|
| Gresham <sup>(25)</sup>    | 9   | C   | 80    | All stroke       | 27 yr | Katz Index, Rosow-Breslau, MMSE, CES-D                                           |
| Anderson <sup>(11)</sup>   | 48  | C   | 70    | All stroke       | 21 yr | Disability by interview, SF-36                                                   |
| Tuomilehto <sup>(10)</sup> | 201 | C   | ?     |                  | 14 yr | ADL index, psychosomatic status, perceived mental status and health by interview |
| Hardie <sup>(8)</sup>      | 45  | C   | ?     | 1st stroke       | 10 yr | mRS                                                                              |
| Hackett <sup>(12)</sup>    | 637 | C   | 71    | 1st stroke       | 6 yr  | BADL, SF-36                                                                      |
| Kappelle <sup>(7)</sup>    | 212 | H   | 15-45 | Ischaemic stroke | 6 yr  | BI, MMSE, SF-36                                                                  |
| Hankey <sup>(26)</sup>     | 152 | C   | 72    | All stroke       | 5 yr  | mRS                                                                              |
| Wilkinson <sup>(27)</sup>  | 106 | C/H | 71    | 1st stroke       | 5 yr  | BI, mRS, FAI, MMSE, HADS                                                         |

N= number of patients, C = community based, H = hospital based, F-up = mean duration of follow-up, BADL = Basic Activities of Daily Living, BI = Barthel Index, mRS = modified Rankin Scale, FAI = Frenchay Activities Index, MMSE = Mini-Mental State Examination, SF-36 = Short Form of Medical Outcome Studies scale, HADS = Hospital Anxiety and Depression Scale, CES-D = Center of Epidemiological Studies-Depression scale.

**Web-table 2** Regression analysis according to the different types of professional care

| Variable                                 | Therapy<br>OR (95% CI) | ADL care<br>OR (95% CI) | Adjustments<br>OR (95% CI) |
|------------------------------------------|------------------------|-------------------------|----------------------------|
| Age                                      | 1.1 (0.7-1.7)          | 2.3 (1.3-4.1)           | 1.7 (1.0-2.7)              |
| Minor stroke                             | 1.8 (0.8-1.7)          | 1.8 (0.7-4.6)           | 2.1 (0.9-4.7)              |
| Dependency in ADL<br>(BI < 20)           | 2.5 (1.0-6.4)          | 2.4 (0.9-6.4)           | 2.6 (1.1-6.2)              |
| Moderate to severe handicap<br>(mRS > 2) | 1.1 (0.4-3.1)          | 5.4 (2.0-14.2)          | 8.3 (3.4- 20.5)            |

OR = Odds Ratio, CI = Confidence Interval, BI = Barthel Index, mRS = modified Rankin Score
