# Supplementary material
Source: PubMed Central journal article supplement (PMC2077397)
Supplement: jnnpsyc_jnnp.2006.089391_2.pdf [file jnnpsyc_jnnp.2006.089391_2.pdf]

**Web-table 2** Regression analysis according to the different types of professional care

| Variable                                 | Therapy<br>OR (95% CI) | ADL care<br>OR (95% CI) | Adjustments<br>OR (95% CI) |
|------------------------------------------|------------------------|-------------------------|----------------------------|
| Age                                      | 1.1 (0.7-1.7)          | 2.3 (1.3-4.1)           | 1.7 (1.0-2.7)              |
| Minor stroke                             | 1.8 (0.8-1.7)          | 1.8 (0.7-4.6)           | 2.1 (0.9-4.7)              |
| Dependency in ADL<br>(BI < 20)           | 2.5 (1.0-6.4)          | 2.4 (0.9-6.4)           | 2.6 (1.1-6.2)              |
| Moderate to severe handicap<br>(mRS > 2) | 1.1 (0.4-3.1)          | 5.4 (2.0-14.2)          | 8.3 (3.4- 20.5)            |

OR = Odds Ratio, CI = Confidence Interval, BI = Barthel Index, mRS = modified Rankin Score
